# Supplementary material for: Morphological changes in female reproductive organs in the African monarch butterfly, host to a male-killing Spiroplasma
Source: PeerJ journal article supplement (doi:10.7717/peerj.15853), 2023-08-15

a)

Corpus bursa area (wing size-corrected)

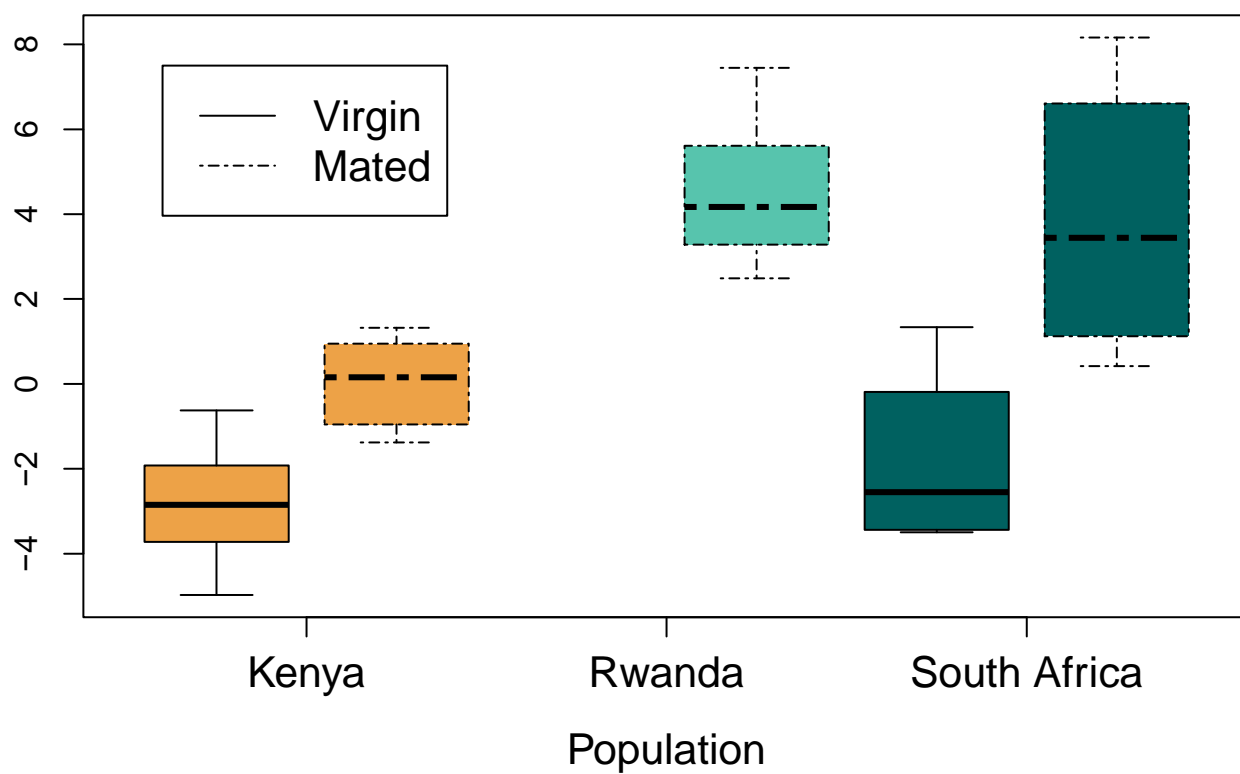

b)

Signum area (wing size-corrected)

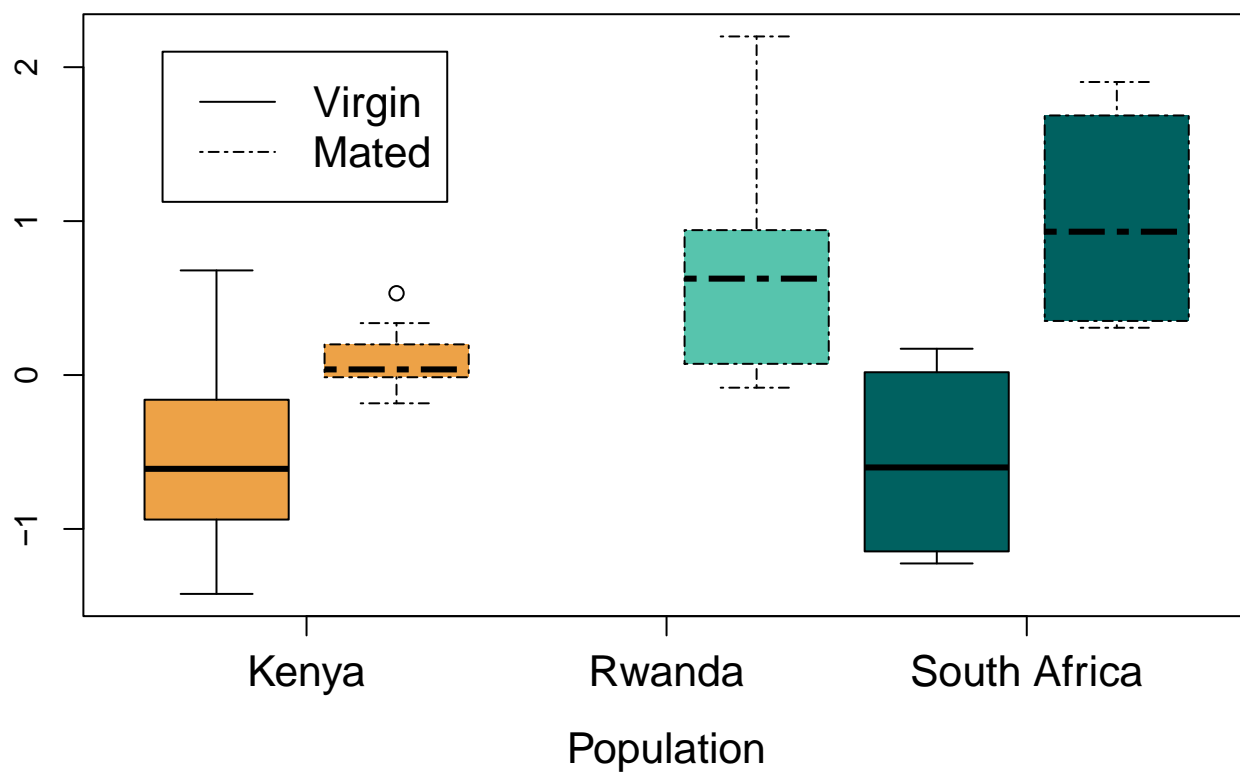

Supplement: FigureS1-SupplementaryMaterial-Malmberg-March2023.pdf [file FigureS1-SupplementaryMaterial-Malmberg-March2023.pdf]
